# Supplementary material for: Repetitive DNA is associated with centromeric domains in Trypanosoma brucei but not Trypanosoma cruzi
Source: Springer Nature journal article supplement (doi:10.1186/gb-2007-8-3-r37), 2007-03-12

### Additional Data File 1.

Strategy for telomere-associated chromosome fragmentation of the small homologue of *T. cruzi* chromosome 1.

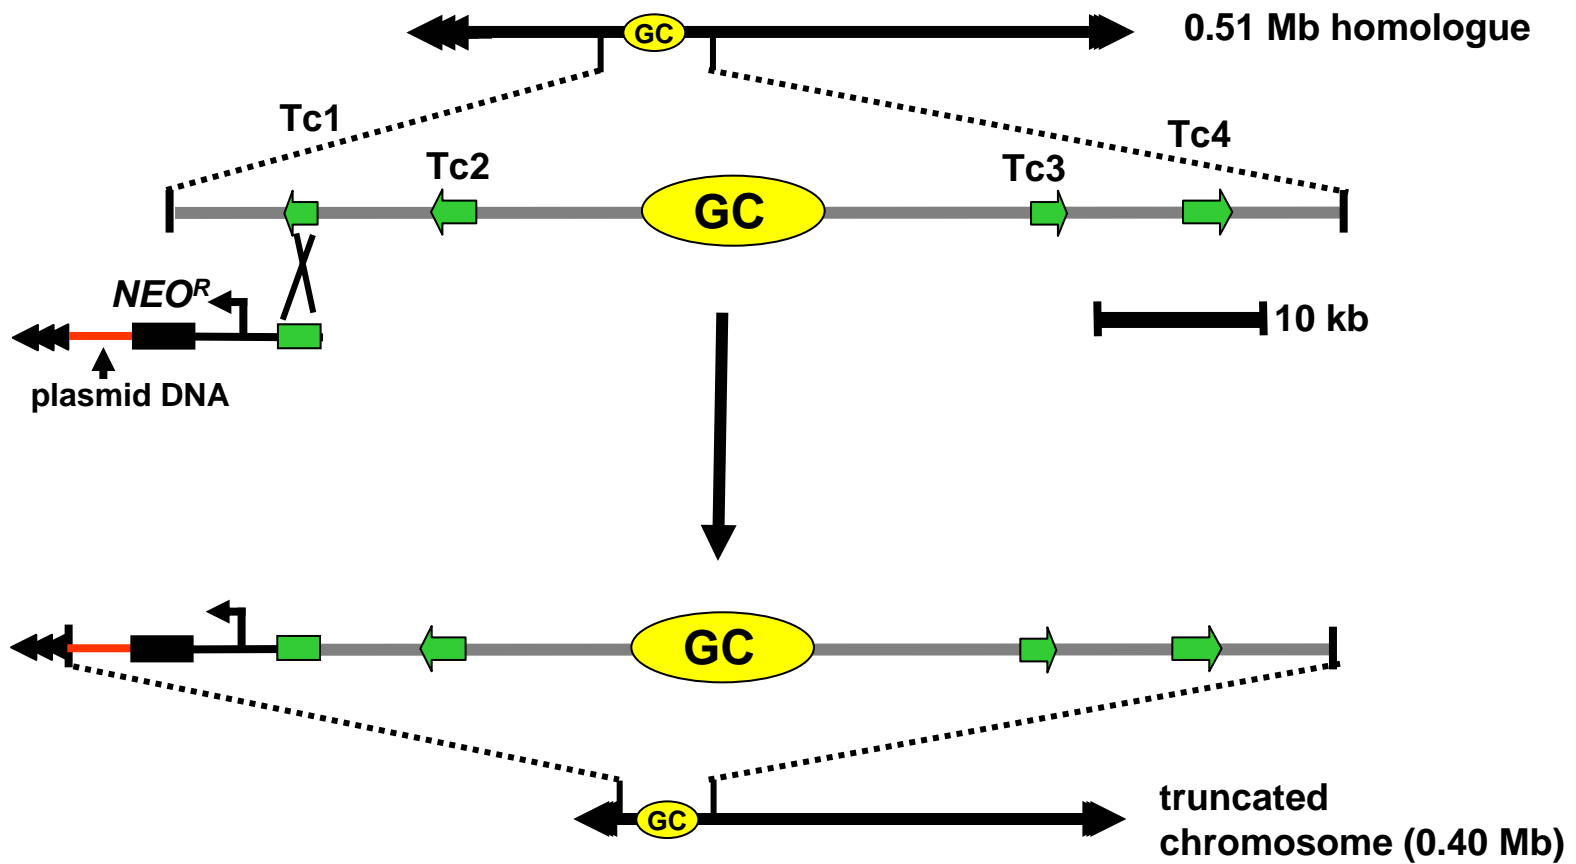

Supplement: Additional file 1 [file gb-2007-8-3-r37-s1.pdf]
