# Supplementary material for: Repetitive DNA is associated with centromeric domains in Trypanosoma brucei but not Trypanosoma cruzi
Source: Springer Nature journal article supplement (doi:10.1186/gb-2007-8-3-r37), 2007-03-12
Supplement: Additional file 5 [file gb-2007-8-3-r37-s5.pdf]

|      | <b>Chromosome</b> | <b>GeneDB systemic name</b> |
|------|-------------------|-----------------------------|
| Tc1  | 1                 | Tc00.1047053508707.160      |
| Tc2  | 1                 | Tc00.1047053508707.190      |
| Tc3  | 1                 | Tc00.1047053508707.320      |
| Tc4  | 1                 | Tc00.1047053511021.30       |
| Tc5  | 1                 | Tc00.1047053511019.99       |
| Tc6  | 1                 | Tc00.1047053511021.80       |
| Tc7  | 3                 | Tc00.1047053506529.660      |
| Tc8  | 3                 | Tc00.1047053506529.600      |
| Tc9  | 3                 | Tc00.1047053506529.508      |
| Tc10 | 3                 | Tc00.1047053506529.340      |
| Tc11 | 3                 | Tc00.1047053398147          |
| Tc12 | 3                 | Intergenic sequence*        |

\*see Materials and Methods

| <b><i>T. brucei</i> probes</b> | <b>Chromosome</b> | <b>GeneDB systemic name</b>        |
|--------------------------------|-------------------|------------------------------------|
| Tb1                            | 1                 | Tb927.1.2340                       |
| Tb2                            | 1                 | Tb927.1.3560                       |
| Tb3                            | 1                 | Tb927.1.3830                       |
| Tb4                            | 1                 | Tb927.1.4720                       |
| Tb5                            | 2                 | Tb927.2.1380                       |
| Tb6                            | 2                 | Tb927.2.2090                       |
| Tb7                            | 3                 | Tb927.3.3300                       |
| Tb8                            | 3                 | Tb927.3.3550                       |
| Tb9                            | 4                 | Tb927.4.3690                       |
| Tb10                           | 4                 | Tb927.4.3820                       |
| Tb11                           | 5                 | Tb927.5.570                        |
| Tb12                           | 6                 | Intergenic sequence (35563-36918)* |
| Tb13                           | 7                 | Tb927.7.1690                       |
| Tb14                           | 7                 | Tb927.7.6820                       |
| Tb15                           | 7                 | Tb927.7.6910                       |
| Tb16                           | 8                 | Tb927.8.7710                       |
| Tb17                           | 8                 | Tb927.8.7770                       |
| Tb18                           | 4                 | Tb927.4.1480                       |

\* see Materials and Methods

#### **Additional Data File 5.**

List of *T. cruzi* (Tc1-12) and *T. brucei* (Tb1-18) probes used in this study, together with their GeneDB systemic names.
